1 **Title:** Postpartum breast cancer progression is driven by semaphorin 7a mediated  
2 invasion and survival

3  
4 **Running title:** PPBC is driven by SEMA7A-mediated invasion and survival

5  
6 Sarah E Tarullo<sup>1,2</sup>, Ryan C Hill<sup>3</sup>, Kirk Hansen<sup>3</sup>, Fariba Behbod<sup>4</sup>, Virginia F Borges<sup>1,2,5</sup>,  
7 Andrew C Nelson<sup>6</sup>, and Traci R Lyons<sup>1,2,5\*</sup>

8  
9 **Affiliations:**

10 <sup>1</sup>Department of Medicine, Division of Medical Oncology, CU Anschutz Medical Campus,  
11 Aurora, CO 80045

12  
13 <sup>2</sup>Young Women's BC Translational Program, CU Anschutz Medical Campus, Aurora,  
14 CO 80045

15  
16 <sup>3</sup>Department of Biochemistry and Molecular Genetics, CU Anschutz Medical Campus,  
17 Aurora, CO 80045

18  
19 <sup>4</sup>Division of Cancer and Developmental Biology, University of Kansas Medical Center,  
20 Kansas City, KS 66160

21  
22 <sup>5</sup>University of Colorado Cancer Center, Aurora, CO 80045

23  
24 <sup>6</sup>Department of Laboratory Medicine and Pathology, University of Minnesota,  
25 Minneapolis, MN 55455

26  
27 **\*Corresponding Author:** Traci R Lyons (303-724-3885; [traci.lyons@cuanschutz.edu](mailto:traci.lyons@cuanschutz.edu))

28  
29 **Conflict of Interest:** The authors have declared that no conflict of interest exists.

30

31 **ABSTRACT:**

32 Young women diagnosed with breast cancer (BC) have poor prognosis due to  
33 increased rates of metastasis. Additionally, women within 10 years of most recent  
34 childbirth at diagnosis are ~3 times more likely to develop metastasis than age and  
35 stage matched nulliparous women. We define these cases as postpartum BC (PPBC)  
36 and propose that the unique biology of the postpartum mammary gland drives tumor  
37 progression. Our published results revealed roles for SEMA7A in breast tumor cell  
38 growth, motility, invasion, and tumor associated-lymphangiogenesis, all of which are  
39 also increased in pre-clinical models of PPBC. However, whether SEMA7A drives  
40 progression in PPBC remains largely unexplored. Our results presented herein show  
41 that silencing of SEMA7A decreases tumor growth in a model of PPBC while  
42 overexpression is sufficient to increase growth in nulliparous hosts. Further, we show  
43 that SEMA7A promotes multiple known drivers of PPBC progression including tumor  
44 associated COX-2 expression and fibroblast-mediated collagen deposition in the tumor  
45 microenvironment. Additionally, we show for the first time that SEMA7A expressing cells  
46 deposit fibronectin to promote tumor cell survival. Finally, we show that co-expression of  
47 SEMA7A/COX-2/FN predicts for poor prognosis in breast cancer patient cohorts. These  
48 studies suggest SEMA7A as a key mediator of BC progression and that targeting  
49 SEMA7A may open avenues for novel therapeutic strategies.

50 **INTRODUCTION:**

51 Postpartum breast cancer (PPBC), or breast cancers (BC) diagnosed within 5-10  
52 years of last childbirth, are ~three times more likely to become metastatic [1-3].

53 Specifically, PPBC patients exhibit distant metastasis free five-year survival (DMFS)  
54 rates as low as 70% [1], which are further decreased to 50% after ten years [2].

55 Additionally, PPBC may account over half of BCs diagnosed in women aged <45 [1]. In  
56 a pre-clinical model of PPBC a non-metastatic BC cell line becomes invasive and  
57 metastatic upon orthotopic implantation at the onset of postpartum mammary gland  
58 involution [4]. Postpartum/post-lactational mammary involution returns the gland to the  
59 pre-pregnant state; we and others have shown that programs associated with  
60 postpartum involution are similar to tumor-promotional microenvironments [1, 4-9].

61 Since the MCF10DCIS model initially resembles ductal carcinoma in situ (DCIS), which  
62 progresses to ER/PR/HER2 negative invasive ductal carcinoma (IDC) [10], we utilized  
63 this model to show accelerated tumor growth and progression to IDC in postpartum  
64 hosts [4]. This progression was driven by collagen deposition and expression of  
65 cyclooxygenase-2 (COX-2), both of which were required for tumor cell invasion.

66 Additionally, a weakly tumorigenic breast epithelial cell line, HMLE-Ras<sup>lo</sup>, was similarly  
67 promoted via host driven mechanisms [11]. More recently, expression of a neuronal  
68 guidance molecule, Semaphorin 7a (SEMA7A), was observed in mouse mammary  
69 epithelium during postpartum involution and in the tumors that outgrew after  
70 implantation during involution [6].

71 Semaphorins are characterized for their roles during development, however and  
72 have reported roles in multiple cancer types [12-16] and SEMA7A expression is

73 emerging as poor prognostic indicator [6, 16-20]. SEMA7A can promote cell-  
74 autonomous signaling when it remains bound to the cell via its  
75 glycosylphosphatidylinositol (GPI) membrane link or non-cell-autonomous signaling  
76 when shed via cleavage into the extracellular environment. Here, we show that  
77 SEMA7A protein is expressed in DCIS from BC patients, is necessary for postpartum  
78 tumor progression in our pre-clinical model, and sufficient to drive tumor progression in  
79 nulliparous hosts. We also demonstrate that shed SEMA7A drives collagen deposition  
80 in the tumor microenvironment (TME) via upregulation of collagen I mRNA in fibroblasts,  
81 which promotes expression of COX-2 and invasion. Furthermore, we propose a cell-  
82 autonomous pro-invasive and survival role for SEMA7A that is mediated through  
83 fibronectin (FN), epithelial-to-mesenchymal transition (EMT) and downstream pro-  
84 survival signaling via phosphorylation of AKT. Additionally, we show that SEMA7A  
85 expressing cells exhibit enhanced metastatic capabilities. Finally, our results we  
86 demonstrate that a gene signature of SEMA7A, COX-2, and FN1 predicts for poor  
87 prognosis for BC patients suggest that SEMA7A merits further studies to develop a  
88 novel therapeutic for BC patients.  
89

90 **RESULTS**

91 **SEMA7A promotes postpartum tumor progression in a mouse model and is**  
92 **expressed in DCIS from patients**

93         The MCF10DCIS model is ideal for monitoring early events in the metastatic  
94 cascade, such as the transition from in situ to invasive. To examine whether SEMA7A  
95 drives DCIS progression in postpartum/post-lactational hosts, we orthotopically injected  
96 MCF10DCIS cells stably expressing a SEMA7A targeted shRNA (SEMA7A-KD) or  
97 nontargeting control (Ctrl) [18] at involution day 1 (SFigure1A). We observed that  
98 silencing of SEMA7A is sufficient to decrease tumor growth in postpartum hosts despite  
99 some of the tumors regaining expression of SEMA7A protein (Figure1A; SFigure1B).  
100 Harvested tumors (H&E stained sections) were scored for invasion at 5 weeks post-  
101 injection, when the majority of postpartum tumors are normally invasive (SFigure1C),  
102 and 33% of the SEMA7A-KD were invasive compared to 86% in the controls. Further,  
103 56% of tumors in the SEMA7A-KD group maintained evidence of DCIS versus 12.5%  
104 controls (Figure1B). Finally, 11% of tumors in the KD group were DCIS with  
105 microinvasion compared to 0% of controls. Collagen-mediated upregulation of COX-2 is  
106 a dominant feature that drives invasion in postpartum hosts in the MCF10DCIS model  
107 [4]. Consistent with a role for SEMA7A in collagen/COX-2 dependent invasion in  
108 postpartum hosts, we observe that fibrillar collagen deposition, by Massan's trichrome  
109 stain, and COX-2 expression, by immunohistochemistry (IHC) are significantly  
110 decreased in SEMA7A-KD tumors (Figure1C&D).

111         To determine whether SEMA7A expression was higher in DCIS from postpartum  
112 patients, we performed IHC on DCIS lesions and adjacent normal breast tissue from

113 women in our BC cohort (Figure2A) and quantitated medium + strong staining to show  
114 that DCIS lesions express higher levels of SEMA7A than normal breast tissue  
115 (Figure2B,SFigure2A). Then, when separated by parity status, we observe increased  
116 SEMA7A in DCIS lesions in both nulliparous and postpartum patients, with a trend  
117 toward highest expression in postpartum patients, suggesting that SEMA7A expression  
118 may have relevance to all patients with DCIS, but may be particularly relevant to  
119 postpartum patients (Figure2B,SFigure2B). Consistent with this, paired analysis  
120 between normal and DCIS within each patient revealed that the majority of patients in  
121 both the nulliparous and postpartum groups exhibited increased SEMA7A expression in  
122 DCIS compared to normal (Figure 2C&D). We confirmed this observation by showing  
123 similar data on SEMA7A expression in a tissue microarray consisting of additional  
124 normal breast and matched patient samples of DCIS using kidney and placenta as  
125 negative and positive controls, respectively (Figure2E-G,SFigure2C). Finally, we also  
126 show that SEMA7A mRNA levels are increased in DCIS compared to normal in the  
127 METABRIC [21] dataset and that SEMA7A is in the top 11% of upregulated genes in  
128 DCIS compared normal ( $p=0.002$ )(SFigure2D). Taken together, our results suggest that  
129 SEMA7A may represent a general mediator of DCIS growth and invasion in both parous  
130 and nulliparous women.

131 To test our hypothesis that SEMA7A expression is sufficient to drive DCIS  
132 progression, we injected MCF10DCIS cells that overexpress SEMA7A protein  
133 (SEMA7A-OE), along with controls, into a separate cohort of nulliparous hosts; we  
134 observed accelerated growth of SEMA7A-OE tumors (Figure3A). These tumors were  
135 similarly scored for invasion, but at three weeks post-injection, when tumors are

136 normally DCIS in nulliparous hosts (SFigure1C). While, control tumors were all DCIS, as  
137 expected, greater than 50% of the SEMA7A-OE tumors had microinvasion and/or were  
138 mixed IDC+DCIS (Figure3B;SFigure 3). Additionally, levels of collagen and COX-2,  
139 which are normally very low in DCIS tumors in nulliparous hosts, are higher in the  
140 SEMA7A-OE tumors, which is consistent with a role for SEMA7A in promoting  
141 production (Figure3C&D).

### 142 **SEMA7A promotes tumor cell invasion via matrix deposition and acquisition of** 143 **mesenchymal phenotypes**

144 To model SEMA7A dependent invasion in vitro, we utilized a 3D organoid model  
145 with SEMA7A-OE cells suspended in Matrigel or Matrigel+collagen [4]. We found that  
146 SEMA7A overexpression was not sufficient to drive increased invasion on Matrigel  
147 alone but sufficient when collagen I was present in the matrix (Figure4A&B). We then  
148 validated the requirement for both collagen and SEMA7A in invasion via knockdown in  
149 the MDA-MB-231 cell line, which requires collagen for 3D organoid formation [22]  
150 (SFigure4A, Figure4C). Since fibroblasts in the TME produce collagen, we then stained  
151 for alpha-smooth muscle actin ( $\alpha$ SMA), a marker of activated fibroblasts, but did not  
152 observe differences in fibroblast infiltration (SFigure4). These results suggest that  
153 SEMA7A does not recruit tumor infiltrating fibroblasts.

154 Alternatively, to determine whether SEMA7A expressing tumor cells promote  
155 collagen production by fibroblasts via shedding of SEMA7A, we induced serum starved  
156 fibroblasts with conditioned media from our SEMA7A-OE tumor cells, alongside  
157 conditioned media from control cells and TGF $\beta$  as positive control and examined  
158 expression of the *COL1A1* mRNA by qPCR. We focused on *COL1A1* because collagen

159 I is the most abundant collagen in the mammary gland [23]. Conditioned medias from  
160 SEMA7A OE cells induced *COL1A1* expression in fibroblasts to higher levels than  
161 observed in control or TGF $\beta$  treated fibroblasts (Figure4D). Then, we treated fibroblasts  
162 with purified SEMA7A to show specific induction of COL1A1 gene expression  
163 (Figure4E). To understand additional SEMA7A mediated changes to the TME, we  
164 performed an unbiased mass spectrometry analysis of conditioned medias from ex vivo  
165 tumors derived from SEMA7A-KD or control cells. When we restricted our analysis to  
166 ECM peptides of human origin we observed downregulation of several ECM associated  
167 molecules with SEMA7A-KD (SFigure4A), but focused on the significant decrease in  
168 fibronectin (FN) (Figure5A) after immunostaining of our tumors confirmed decreased FN  
169 expression with SEMA7A-KD (Figure5B&C). As FN is frequently associated with EMT,  
170 we examined whether SEMA7A expression is also associated with additional  
171 mesenchymal markers. We observed SEMA7A dependent expression of matrix  
172 remodeling enzyme, matrix metalloproteinase-2, vimentin, and S100A4, as well as other  
173 members of the S100 family of proteins (Figure5D-F;SFigure4B-E), which are all  
174 secreted by mesenchymal-like cells [24]. To confirm SEMA7A-dependent  
175 mesenchymal-like phenotypes we measured cell aspect ratios with the prediction that  
176 epithelial-like cells, due to their cuboidal morphology, would exhibit a ratio of ~1 and  
177 ratios >1 would be indicative of mesenchymal-like cells. Our results reveal that the  
178 mesenchymal-like MDA-MB-231 cells, exhibit decreased average aspect ratios with  
179 SEMA7A-KD (Figure5G). Concordantly, SEMA7A-OE in the MCF10DCIS cells, which  
180 are less mesenchymal-like, resulted in increased aspect ratios (Figure5H). Furthermore,  
181 immunoblot analysis of MCF10DCIS SEMA7A-OE cells reveals decreased E-cadherin



182 and increased vimentin expression, markers of epithelial and mesenchymal cells,  
183 respectively (SFigure5F). Together, our results suggest that SEMA7A promotes cellular  
184 invasion via both cell-autonomous and non-cell-autonomous mechanisms of matrix  
185 deposition and remodeling.

### 186 **SEMA7A promotes cell survival via fibronectin, AKT and COX-2**

187 We also observed decreased tumor growth of SEMA7A-KD tumors in vivo but did  
188 not see significant changes in proliferation marker Ki67 (SFigure5A). However, we did  
189 observe a trend toward increased cleaved-caspase 3, a marker of apoptosis, in  
190 SEMA7A-KD tumors with a corresponding decrease in SEMA7A-OE tumors  
191 (SFigure5B&C). We also observed increased cell death in SEMA7A-KD cells in culture  
192 via a luminescent assay for caspase activity, which we validated in the MDA-MB-231  
193 cell line (Figure6A&B). Conversely, decreased cell death was observed in the SEMA7A  
194 OE cell in both cell lines (SFigure5D, SFigure5E&F). Additionally, analysis of cell death  
195 in real time confirmed that SEMA7A-KD MDA-MB-231 cells exhibit increases in cell  
196 death via activation of apoptotic signaling (Figure6C). One known pro-survival  
197 mechanism co-opted by tumors to block activation of caspase cleavage is activation of  
198 pro-survival kinase AKT [25] and we observed decreased levels of phosphorylated AKT  
199 via immunoblot for pS473 in SEMA7A-KD and a corresponding increase in levels in  
200 SEMA7A OE cells (Figure6D&SFigure5G). Interestingly, FN signals via integrins, which  
201 can activate downstream pro-survival pathways, including AKT [26]. To determine  
202 whether add-back of FN could rescue SEMA7A-KD cells from cell death, we KD plated  
203 cells FN-, laminin- or collagen-coated plates with control cells on tissue culture plastic  
204 for reference. We observed increased cell death in all SEMA7A-KD conditions except

205 when FN was present where we observed levels of cell death were more similar to the  
206 Ctrl cells (Figure6E). Thus, we suggest that SEMA7A promotes AKT mediated survival  
207 by increasing FN deposition and therefore cellular attachment.

208 Mesenchymal-like tumor cells, known to have high levels of FN, are not as  
209 dependent on matrix attachment for survival and can also exhibit resistance to normal  
210 programs that mediate cell death including survival in detached or anchorage  
211 independent conditions [27]. An initial step of the metastatic cascade involves cell  
212 detachment from ECM to facilitate local invasion and access to the vasculature; then,  
213 cells in circulation must survive in matrix detached conditions prior to extravasating to  
214 seed metastatic sites. To assess a role for SEMA7A in promoting survival in circulation,  
215 we forced cellular detachment in vitro and measured cleaved-caspase 3/7 to show that  
216 SEMA7A-KD increases cell death while SEMA7A-OE promotes cell survival in detached  
217 conditions (Figure6F&G, SFigure5H&I). Interestingly, fibronectin was not sufficient to  
218 rescue cell death in suspension suggesting that fibronectin deposition is necessary  
219 (data not shown). However, since activation of AKT is a known mediator of COX-2  
220 expression [28] we also examined the ability of COX-2 KD cells to survive in detached  
221 conditions. Similar to our results in the SEMA7A-KD cells we observe that COX-2  
222 knockdown cells exhibit increased cell death in detached conditions, which was not  
223 observed in attached conditions (SFigure5J) suggesting that SEMA7A mediated  
224 upregulation of AKT signaling, and subsequent expression of COX-2, support cell  
225 survival in detached conditions such as those encountered during local invasion and in  
226 circulation (Figure 6H).

227 **SEMA7A, COX-2, FN and metastatic potential**

228 To assess whether SEMA7A promotes survival in circulation in vivo, we  
229 performed tail vein injections of MDA-MB-231 SEMA7A-KD or Ctrl cells (SFigure6A)  
230 and assessed for pulmonary metastasis. Our results reveal a decrease in both the  
231 number and average size of metastatic lesions per lung with SEMA7A KD (Figure7A)  
232 suggesting that SEMA7A plays a role in survival in circulation, as well as a possible role  
233 in seeding and outgrowth of BC metastasis. We have previously published that  
234 SEMA7A expression is upregulated in IDC compared to normal and the worst overall  
235 survival (OS) was observed in SEMA7A+ER-BC in the METABRIC dataset [18];  
236 however, in SEMA7A+ER- BCs we do not observe decreased distant metastasis free  
237 survival (DMFS) via KmPlot analysis (SFigure6B). Similarly, although transcripts for  
238 COX-2 and FN1 are also upregulated in BC (STable1), neither COX-2 or FN1 are  
239 associated with decreased DMFS in ER-BC (SFigure6E&F). However, co-expression of  
240 COX-2, SEMA7A, and FN1 increases risk for metastasis in ER-BC patients, with 5 year  
241 DMFS rates approaching 70% by both KmPlot and GOBO (Gene expression-based  
242 Outcome for Breast cancer Online or GOBO) analysis (Figure7B&C) [1]. We also  
243 observed that co-expression of our 3 gene signature significantly associates with  
244 decreased DMFS in basal and PAM50 basal subtype tumors using GOBO (SFigure6G-  
245 I). Finally, co-expression of SEMA7A with both FN and COX-2 is observed in BCs in the  
246 TCGA dataset (Figure6D&E).  
247

## 248 **DISCUSSION**

249 All women experience a transient increase in risk for developing breast cancer  
250 after each completed pregnancy [4, 29, 30]. Additionally, patients diagnosed with breast  
251 cancer within ten years postpartum comprise nearly 50% of all BCs in women <40 in  
252 both US and Norwegian cohorts and these PPBC patients are at high risk for metastatic  
253 spread [1, 31]. A recent publication by Welch and Hurst defines the hallmarks of  
254 metastasis as motility and invasion, modulation of the microenvironment, plasticity, and  
255 colonization [32]. Here, we identify roles for SEMA7A in promotion of metastasis using  
256 preclinical models regardless of parity status. Our results suggest that SEMA7A drives  
257 one described mechanism of tumor progression pertinent to postpartum women, which  
258 is collagen mediated upregulation of COX-2 that drives motility and invasion of DCIS  
259 cells. However, our results also suggest that this mechanism of invasion can be driven  
260 by SEMA7A in both nulliparous and postpartum hosts suggesting it is not unique to  
261 parous patients. Further, we extend our observations and identify a novel cell-  
262 autonomous mechanism by which SEMA7A mediates tumor cell survival via stimulation  
263 of FN production and activation of pro-survival kinase AKT regardless of the host parity  
264 status. We also show that SEMA7A supports tumor cell invasion by stably altering cells  
265 to a more mesenchymal phenotype, which promotes cell survival in anchorage-  
266 independent conditions to allow for colonization of distant organs. Thus, we suggest that  
267 SEMA7A plays a key role in multiple steps toward progression to metastatic disease.  
268 We support this claim by showing a that co-expression of COX-2, SEMA7A, and FN  
269 correlates with distant metastasis formation in BC patients. We propose a model  
270 whereby SEMA7A signaling supports metastatic progression (Figure8).

271 SEMA7A was first identified on lymphocytes and originally designated CDw108  
272 [33]. CDw108 was renamed SEMA7A due to its structural similarities with members of  
273 the Semaphorin family of proteins best known for their roles in neuronal guidance [34].  
274 SEMA7A is the only semaphorin linked to the membrane via a GPI anchor; as such, it  
275 can be cleaved to result in shedding of SEMA7A into the extracellular environment,  
276 which was shown to promote  $\beta$ 1-integrin dependent inflammation and fibrosis [35-41].  
277 During fibrosis and in response to TGF $\beta$ , SEMA7A activates AKT signaling, which  
278 results in upregulation of collagen and FN in a  $\beta$ 1-integrin dependent manner [42].  
279 While our current studies do not explore a role for  $\beta$ 1-integrin, we and others have  
280 shown that SEMA7A- $\beta$ 1-integrin binding promotes tumor growth, EMT,  
281 migration/invasion, metastasis, and neo-vasculogenesis [17, 19, 20]. Herein, we  
282 hypothesize that SEMA7A mediated tumor cell production of FN activates integrin  
283 mediated PI3K signaling leading to activation of AKT and cell survival [26, 43]. We also  
284 show that SEMA7A promotes mesenchymal phenotypes and tumor cell invasion, which  
285 could may be mediated by FN engagement of  $\alpha$ <sub>v</sub> $\beta$ 1-integrin and downstream activation  
286 of Slug resulting in transcription of mesenchymal genes [44, 45]. In support of this  
287 hypothesis, SEMA7A is linked to EMT in a murine model of BC where TGF $\beta$  fails to  
288 induce EMT in the absence of SEMA7A [17]. Additional studies to determine how  
289 SEMA7A and FN contribute to EMT in our model are necessary to fully understand this  
290 mechanism in BC progression.

291 Since upregulation of EMT pathways such as Snail, Slug, and Zeb1 are  
292 associated with decreased sensitivity to chemotherapeutic drugs and targeted tyrosine  
293 kinase inhibitors (TKIs) [17, 46-55], it is also possible that SEMA7A may promote

294 metastasis by conferring resistance to current therapies. In support of this, SEMA7A  
295 promotes resistance to EGFR targeted therapies in lung cancer [13]. Additional studies  
296 will explore the role of SEMA7A in resistance and/or susceptibility to current therapies in  
297 BC. Moreover, one major limitation of our current study is investigation of this  
298 mechanism only in ER- models, which is supported, in part, by our patient dataset  
299 studies showing that SEMA7A expression invokes a higher risk for metastasis in ER-  
300 breast cancers compared to all breast cancer. However, since ER+ breast cancers  
301 comprise the largest percentage of breast cancers in women, additional studies in ER+  
302 breast cancers must be performed. Interestingly, estrogen and/or progesterone promote  
303 SEMA7A expression in the hypothalamus, suggesting that hormones may drive  
304 elevated levels of SEMA7A in BCs [56]. Furthermore, in hormone-receptor positive  
305 (HR+) BCs both AKT and FN promote tamoxifen resistance [57-64] and Semaphorin  
306 4C, which is structurally similar to SEMA7A, drives hormonal-independence in HR+ BCs  
307 [65]. Thus, we are also exploring the relationship between SEMA7A expression and  
308 tumor progression in ER+ models [66].

309 We also demonstrate that SEMA7A is also involved in a non-cell-autonomous  
310 signaling axis via induction of fibroblast production of collagen, which then promotes  
311 COX-2 expression in the tumor cell [4]. Collagen has been characterized for multiple  
312 roles in promoting tumor progression as well as increased breast density, which can  
313 also increase risk for developing BC [8, 67, 68]. Additionally, a single pregnancy is  
314 sufficient to convert the high collagen content of the postpartum breast into pro-  
315 tumorigenic collagen [69] and activated fibroblasts, which deposit collagen, are present  
316 during postpartum involution [4, 8, 23]. Thus, our previous studies showing that

317 SEMA7A is expressed in the postpartum mammary epithelium during involution  
318 SEMA7A, coupled with those presented herein, suggest that SEMA7A could also play a  
319 role in the increased risk for developing BC after pregnancy via increasing collagen  
320 deposition [1, 4, 31, 67, 68]. COX-2 is also well characterized for multiple roles in tumor  
321 initiation and progression [70, 71]. While our results suggest that SEMA7A stimulates  
322 collagen production by fibroblasts to result in tumor cell expression of COX-2 we still do  
323 not fully understand this mechanism. Additionally, our current studies have not  
324 addressed whether COX-2 activity is increased in tumor cells on collagen. Our data also  
325 suggest SEMA7A activation of AKT may play a role in promoting survival via  
326 upregulation of COX-2. Further studies are needed to understand the molecular  
327 mechanisms underlying SEMA7A and COX-2 signaling, regulation, and their roles in  
328 promoting tumor cell invasion and survival.

329         Currently there are no prevention strategies, targeted therapies, or specific  
330 treatment options for women diagnosed postpartum or for women with high tumor  
331 expression of SEMA7A. If our proposed SEMA7A mediated mechanism of progression  
332 is also dependent on COX-2 activity, as is suggested by our previous studies [4, 7], the  
333 addition of a COX-2 inhibitor to current treatment regimens could have efficacy in  
334 postpartum or SEMA7A+ BC patients. We also propose that SEMA7A expression could  
335 predict progression or itself be a potential therapeutic target for BC patients. If direct  
336 targeting of SEMA7A is not feasible, SEMA7A activates downstream targets such as  
337 FAK, Src, and ERK [16, 72], for which targeted therapies are available. Although these  
338 targeted inhibitors have been largely unsuccessful in BC, SEMA7A could serve as a  
339 predictive biomarker for patients who may benefit. Since metastases are the leading

340 cause of BC related deaths and are largely untreatable, these novel anti-metastatic  
341 treatment strategies should be explored.

342  
343 **MATERIALS AND METHODS**

344 **Cell Culture**

345 MCF10DCIS and MDA-MB-231 were cultured in 2D and 3D cultures as previously  
346 described [4, 18, 22]. MCF10DCIS cells and previously described shCOX-2 derivatives  
347 [73] were obtained from K. Polyak and A. Marusyk (Harvard University, Cambridge,  
348 MA). MDA-MB-231 cells were obtained from P. Schedin (Oregon Health and Sciences  
349 University, Portland OR). HLF-1 cells were gifted from M. Fini (CU Anschutz Medical  
350 Campus, Denver, CO). Cells were validated by the DNA sequencing core at the CU  
351 Anschutz Medical Campus and identified to be a pure population of their respective cell  
352 lines. Cells were regularly tested for mycoplasma throughout studies. shRNA silencing  
353 was achieved using shRNA SEMA7A targeting plasmids (SABiosciences, Frederick, MD,  
354 and Functional Genomics Facility at CU Anschutz Medical Campus, Denver, CO) and  
355 confirmed via qPCR and Western blot analysis. Overexpression plasmid (SEMA7A-Fc)  
356 was a generous gift from R. Medzhitov (Yale University, New Haven, CT). Control  
357 plasmid (pcDNA3.1) was obtained from H. Ford (CU Anschutz Medical Campus,  
358 Denver, CO). All other overexpression plasmids (p304-V5-Blasticidin and V5-SEMA7A)  
359 were obtained from the Functional Genomics Core at the CU Anschutz Medical Campus  
360 and overexpression was confirmed via qPCR and Western blot analysis. Purified  
361 SEMA7A was isolated from MDA-MB-231 cells engineered to overexpress SEMA7A-Fc  
362 in collaboration with the Protein Purification/MoAB/Tissue culture core at the CU  
363 Anschutz Medical Campus. Cells were forced into suspension by coating plates with 12



364 mg/ml poly-HEMA (poly (2-hydroxyethyl methacrylate), Sigma, St. Louis, MO) prior to  
365 plating.

### 366 **Tissue microarray**

367 Tissue microarrays containing normal and DCIS samples were prepared from biopsy  
368 tissue following placement in preservation media (LiforCell, Lifeblood Medical, Inc.) and  
369 storage at 4°C, as previously described [74].

### 370 **qPCR**

371 RNA was isolated and qPCR were performed as previously described, with GAPDH and  
372 RPS18 as reference genes [18]. Primers for SEMA7A, COL1A1, COX-2 were obtained  
373 from Bio-Rad (Bio-Rad PrimePCR, Hercules, CA). Other primers were designed to be  
374 intron spanning with the following sequences: GAPDH (forward:  
375 CAAGAGCACAAGAGGAA GAGAG, reverse: CTACATGGCAACTGTGAGGAG) and  
376 RPS18 (forward: GCGAGTACTCAACACCAACA, reverse:  
377 GCTAGGACCTGGCTGTATTT).

### 378 **Immunoblot analysis**

379 Western blots were performed as previously described [18]. Antibody information is  
380 provided in STable2.

### 381 **Animal model**

382 The MCF10DCIS model was utilized as previously described [4, 18]. Briefly, 6-8-week-  
383 old female SCID Hairless Outbreed mice from Charles River were bred and, after birth,  
384 pup numbers were normalized to 6-8 pups per dam. After 10-13 days of lactation, pups  
385 were removed to initiate involution (Day 0). Subsequently, injections of 250K  
386 MCF10DCIS controls and cells with shSEMA7A were initiated one day post-weaning

387 (involution day 1) bilaterally into the #4 mammary fat pads. For SEMA7A  
388 overexpressing studies, 6-8-week-old Nude athymic (nulliparous) from Charles River  
389 were utilized because they are more cost-effective than SCID mice and breeding is not  
390 necessary for studies in nulliparous hosts. Tumors were measured twice weekly. For  
391 metastasis studies, nude mice were injected with  $1 \times 10^6$  cells into the tail vein, monitored  
392 for weight loss and sacrificed 3 weeks post-injection.

### 393 **Histologic analysis**

394 Mammary glands with intact tumor were prepared for immunohistochemistry as  
395 previously described [4, 7]. Hematoxylin and eosin stained sections were examined by a  
396 board-certified anatomic pathologist (ACN) as scored as follows: 0-lesions which  
397 contained only well-developed DCIS structures with clearly defined basement  
398 membranes and no evidence of microinvasion; 1-lesions that contained extensive DCIS  
399 with identifiable micro-invasive foci; 2-lesions that contained significant areas of sheet-  
400 like invasive tumor growth and mixed with areas of DCIS; 3-lesions that contained  
401 entirely invasive tumor with rare to absent DCIS remnants. The pathologist was blinded  
402 to study group by the randomization of animal numbers in each group.

### 403 **Immunohistochemistry and Immunofluorescence**

404 For FN and COX-2 400X images were taken of intact tumor and quantitated using  
405 ImageJ software. For SEMA7A, cleaved caspase-3, and trichrome, stain quantification  
406 of total tumor area (necrotic and stromal areas removed) and percent positive stain or  
407 stain intensity was performed using ImageScope Aperio Analysis software (Leica,  
408 Buffalo Grove, IL). Areas for quantification were annotated using Aperio analysis tools  
409 and percent weak, medium, and strong determined using the color-deconvolution

410 algorithm. For COX-2 and FN analysis, areas for quantification were isolated from the  
411 surrounding stroma and percent positive calculated as area with positive stain (positive  
412 pixels) using Image J and divided by total area (total pixels) and multiplied by  
413 100. Immunofluorescent images were obtained using 400X magnification on OLYMPUS  
414 microscope. Antibody information is provided in STable 2.

#### 415 **In vitro cell death assay**

416 Cell death was analyzed using Caspase-Glo 3/7 Assay (Promega, Madison, WI),  
417 according to the manufacturer's instructions.

#### 418 **Analysis of publicly available datasets**

419 Km plotter was queried for BC, and SEMA7A, PTGS2 (COX-2), and FN1 using the  
420 multigene classifier mean centered option for distant metastasis free survival (DMFS)  
421 [75]. ER- status was determined from ESR1 gene expression data. Ma breast cancer  
422 dataset was queried for SEMA7A, PTGS2 (COX-2), and FN1 using Gene expression-  
423 based Outcome for Breast Cancer Online (GOBO). TCGA was queried for co-  
424 expression of SEMA7A and COX-2 or FN1 using CBioPortal.

#### 425 **Mass spectrometry analysis**

426 Small tumor sections (~1mm) were placed on gelatin sponges (Novartis Animal Health,  
427 Greensboro, NC, USA) in serum-free media as previously described [76]. After 48  
428 hours, tumor conditioned media was collected ~ 30 µg of total protein digested utilizing  
429 the filter-aided sample digestion (FASP) protocol as previously described according to  
430 MAIPE standards [77]. Briefly, samples were reduced, alkylated, and enzymatically  
431 digested with trypsin. Resulting peptides were concentrated and de-salted by solid  
432 phase extraction utilizing in-house made stage tips made with Styrene Divinyl Benzene

433 disks (Empore™). Liquid chromatography tandem mass spectrometry (LC-MS/MS) was  
434 performed on a Thermo nanoEasy LC II coupled to a Q Exactive HF. MS acquisition  
435 parameters are detailed previously [78]. Raw files were searched with Proteome  
436 Discoverer 2.2 against the Mus Musculus, Homo Sapiens, and Bos Taurus uniprotKB  
437 database in Mascot. Precursor mass tolerance was set to +/- 10 ppm and MS/MS  
438 fragment ion tolerance of +/- 25 ppm. Trypsin specificity was selected allowing for 1  
439 missed cleavage. Variable modifications include Met oxidation, proline hydroxylation,  
440 protein N-terminal acetylation, peptide N-terminal pyroglutamic acid formation, and a  
441 fixed modification of Cys carbamidomethylation.  
442 Search results were visualized using Metaboanalyst v4.0 [79] and gene ontology  
443 mapping was done using PANTHER [80]. Data were prepared according to MIAPE  
444 standards and will be made available upon publication.

#### 445 **Experimental replicates, sample size and statistical analyses.**

446 All in vitro studies were performed in biological triplicates. For animal studies, we chose  
447 the number of mice/group/time-point, based on power calculations from previous and  
448 pilot studies to achieve at least 80% power ( $\beta$ ) with  $\alpha=0.05$ . All animal studies were  
449 replicated twice with representative or pooled data shown. Unpaired and paired t-tests,  
450 ANOVA, and Kaplan Meier statistical analyses were performed in GraphPad Prism,  
451 assuming independent samples and normal distributions. Analyses for Figure 2 were  
452 done using one-tailed t-tests, as our results from Figure 1 would predict significant  
453 differences between groups. All other analyses were done using two-tailed tests. Only  
454 p-values of less than 0.05 were considered significant. Aside from unexpended death or  
455 cell contamination, no samples or animals were excluded from our analysis. For IHC

456 analysis of tumors, outliers were removed if they were significant by the ROUT (Q=1%)  
457 test.

#### 458 **Study Approval**

459 Prior to resection, patients provided written informed consent under an IRB-approved  
460 protocol according to the guidelines of their respective institutions and conducted in  
461 compliance with HIPPA regulations. All animal studies were approved by the IACUC of  
462 the CU Anschutz Medical Campus, protocol number B106017(06)1E.

463

464 **Author Contributions**

465 SET and TRL conceived and designed the study. SET performed all in vitro and in vivo  
466 studies. VFB and FB were responsible for regulatory oversight of human tissue  
467 acquisition and providing cases for IHC analysis. RCH and KH were responsible for all  
468 mass spectrometry experiments and associated data analysis. ACN was responsible for  
469 analyzing and scoring all tumor for invasion. SET and TRL were responsible for  
470 hypothesis development, conceptual design, data analysis and data interpretation. SET  
471 and TRL wrote the manuscript with all authors providing critical evaluation.

472 **Acknowledgements**

473 MCF10DCIS cells were obtained from K. Polyak and A. Marusyk (Harvard University,  
474 Cambridge, MA). MDA-MB-231 cells were obtained from P. Schedin (Oregon Health and  
475 Sciences University, Portland OR). HLF-1 cells were gifted from M. Fini (CU Anschutz  
476 Medical Campus, Denver, CO). H. Ford for the pcDNA3.1 vector (CU Anschutz Medical  
477 Campus, Denver, CO).; and R. Medzhitov (Yale University, New Haven, CT) for the  
478 SEMA7A-Fc overexpression vector. We also acknowledge V. Wessells, A. Elder, L.  
479 Crump, T. Wallace, C. Young, A. Stoller, M. Kobritz, and C. Hoang for technical support  
480 and advice. This work was supported by the American Cancer Society (RSG 16-171-01-  
481 CSM), and NIH/NCI (R01CA211696-01A1) to T. Lyons; NIH/CCTSI/CTSA (TL1  
482 TR001081) to S. Tarullo.

483

484 **Supplementary Information** is available on *Oncogene's* website.

## References

- 485  
486
- 487 1 Callihan EB, Gao D, Jindal S, Lyons TR, Manthey E, Edgerton S *et al.*  
488 Postpartum diagnosis demonstrates a high risk for metastasis and merits an  
489 expanded definition of pregnancy-associated breast cancer. *Breast cancer*  
490 *research and treatment* 2013; 138: 549-559.  
491
  - 492 2 Erica T. Goddard SB, Troy Schedin, Sonali Jindal, Jeremy Johnston, Ethan  
493 Cabral, Traci R. Lyons, Motomi Mori, Pepper J. Schedin, Virginia F. Borges.  
494 Defining the impact of a postpartum diagnosis on metastasis and the clinical  
495 features underlying risk: A young women's breast cancer cohort study. *Jama*  
496 *Network* 2018; In press.  
497
  - 498 3 Nichols HB, Schoemaker MJ, Cai J, Xu J, Wright LB, Brook MN *et al.* Breast  
499 Cancer Risk After Recent Childbirth: A Pooled Analysis of 15 Prospective  
500 Studies. *Ann Intern Med* 2018.  
501
  - 502 4 Lyons TR, O'Brien J, Borges VF, Conklin MW, Keely PJ, Eliceiri KW *et al.*  
503 Postpartum mammary gland involution drives progression of ductal carcinoma in  
504 situ through collagen and COX-2. *Nature medicine* 2011; 17: 1109-1115.  
505
  - 506 5 Slepicka PF, Cyrill SL, Dos Santos CO. Pregnancy and Breast Cancer: Pathways  
507 to Understand Risk and Prevention. *Trends Mol Med* 2019.  
508
  - 509 6 Elder AM, Tamburini BAJ, Crump LS, Black SA, Wessells VM, Schedin PJ *et al.*  
510 Semaphorin 7A Promotes Macrophage-Mediated Lymphatic Remodeling during  
511 Postpartum Mammary Gland Involution and in Breast Cancer. *Cancer research*  
512 2018; 78: 6473-6485.  
513
  - 514 7 Lyons TR, Borges VF, Betts CB, Guo Q, Kapoor P, Martinson HA *et al.*  
515 Cyclooxygenase-2-dependent lymphangiogenesis promotes nodal metastasis of  
516 postpartum breast cancer. *The Journal of clinical investigation* 2014; 124: 3901-  
517 3912.  
518
  - 519 8 Guo Q, Minnier J, Burchard J, Chiotti K, Spellman P, Schedin P. Physiologically  
520 activated mammary fibroblasts promote postpartum mammary cancer. *JCI*  
521 *Insight* 2017; 2: e89206.  
522
  - 523 9 Asztalos S, Gann PH, Hayes MK, Nonn L, Beam CA, Dai Y *et al.* Gene  
524 expression patterns in the human breast after pregnancy. *Cancer Prev Res*  
525 *(Phila)* 2010; 3: 301-311.  
526
  - 527 10 Miller FR, Santner SJ, Tait L, Dawson PJ. MCF10DCIS.com xenograft model of  
528 human comedo ductal carcinoma in situ. *Journal of the National Cancer Institute*  
529 2000; 92: 1185-1186.  
530

- 531 11 Gupta PB, Proia D, Cingoz O, Weremowicz J, Naber SP, Weinberg RA *et al.*  
532 Systemic stromal effects of estrogen promote the growth of estrogen receptor-  
533 negative cancers. *Cancer research* 2007; 67: 2062-2071.  
534
- 535 12 Rehman M, Tamagnone L. Semaphorins in cancer: biological mechanisms and  
536 therapeutic approaches. *Semin Cell Dev Biol* 2013; 24: 179-189.  
537
- 538 13 Kinehara Y, Nagatomo I, Koyama S, Ito D, Nojima S, Kurebayashi R *et al.*  
539 Semaphorin 7A promotes EGFR-TKI resistance in EGFR mutant lung  
540 adenocarcinoma cells. *JCI Insight* 2018; 3.  
541
- 542 14 Ma B, Herzog EL, Lee CG, Peng X, Lee CM, Chen X *et al.* Role of chitinase 3-  
543 like-1 and semaphorin 7a in pulmonary melanoma metastasis. *Cancer research*  
544 2015; 75: 487-496.  
545
- 546 15 Saito T, Kasamatsu A, Ogawara K, Miyamoto I, Saito K, Iyoda M *et al.*  
547 Semaphorin7A promotion of tumoral growth and metastasis in human oral cancer  
548 by regulation of g1 cell cycle and matrix metalloproteases: Possible contribution  
549 to tumoral angiogenesis. *PLoS one* 2015; 10: 1-20.  
550
- 551 16 Scott Ga, McClelland La, Fricke AF, Fender A. Plexin C1, A Receptor for  
552 Semaphorin 7A, Inactivates Cofilin and Is a Potential Tumor Suppressor for  
553 Melanoma Progression. *Journal of Investigative Dermatology* 2009; 129: 954-  
554 963.  
555
- 556 17 Allegra M, Zaragkoulias A, Vorgia E, Ioannou M, Litos G, Beug H *et al.*  
557 Semaphorin-7a reverses the ERF-induced inhibition of EMT in Ras-dependent  
558 mouse mammary epithelial cells. *Molecular biology of the cell* 2012; 23: 3873-  
559 3881.  
560
- 561 18 Black SA, Nelson AC, Gurule NJ, Futscher BW, Lyons TR. Semaphorin 7a exerts  
562 pleiotropic effects to promote breast tumor progression. *Oncogene* 2016; 35:  
563 5170-5178.  
564
- 565 19 Garcia-Areas R, Libreros S, Amat S, Keating P, Carrio R, Robinson P *et al.*  
566 Semaphorin7A promotes tumor growth and exerts a pro-angiogenic effect in  
567 macrophages of mammary tumor-bearing mice. *Frontiers in physiology* 2014; 5:  
568 17.  
569
- 570 20 Garcia-Areas R, Libreros S, Simoes M, Castro-Silva C, Gazaniga N, Amat S *et al.*  
571 Suppression of tumor-derived Semaphorin 7A and genetic ablation of host-  
572 derived Semaphorin 7A impairs tumor progression in a murine model of  
573 advanced breast carcinoma. *Int J Oncol* 2017; 51: 1395-1404.  
574



- 575 21 Curtis C, Shah SP, Chin SF, Turashvili G, Rueda OM, Dunning MJ *et al.* The  
576 genomic and transcriptomic architecture of 2,000 breast tumours reveals novel  
577 subgroups. *Nature* 2012; 486: 346-352.  
578
- 579 22 Jacob A, Jing J, Lee J, Schedin P, Gilbert SM, Peden AA *et al.* Rab40b regulates  
580 trafficking of MMP2 and MMP9 during invadopodia formation and invasion of  
581 breast cancer cells. *Journal of cell science* 2013; 126: 4647-4658.  
582
- 583 23 Maller O, Hansen KC, Lyons TR, Acerbi I, Weaver VM, Prekeris R *et al.* Collagen  
584 architecture in pregnancy-induced protection from breast cancer. *Journal of cell  
585 science* 2013; 126: 4108-4110.  
586
- 587 24 Kalluri R, Weinberg RA. The basics of epithelial-mesenchymal transition. *The  
588 Journal of clinical investigation* 2009; 119: 1420-1428.  
589
- 590 25 Balmanno K, Cook SJ. Tumour cell survival signalling by the ERK1/2 pathway.  
591 *Cell death and differentiation (Review)* 2008; 16: 368.  
592
- 593 26 Reddig PJ, Juliano RL. Clinging to life: cell to matrix adhesion and cell survival.  
594 *Cancer Metastasis Rev* 2005; 24: 425-439.  
595
- 596 27 Tiwari N, Gheldof A, Tatari M, Christofori G. EMT as the ultimate survival  
597 mechanism of cancer cells. *Seminars in Cancer Biology* 2012; 22: 194-207.  
598
- 599 28 St-Germain ME, Gagnon V, Parent S, Asselin E. Regulation of COX-2 protein  
600 expression by Akt in endometrial cancer cells is mediated through NF-  
601 kappaB/IkappaB pathway. *Mol Cancer* 2004; 3: 7.  
602
- 603 29 Schedin P. Pregnancy-associated breast cancer and metastasis. *Nature reviews  
604 Cancer* 2006; 6: 281-291.  
605
- 606 30 Albrektsen G, Heuch I, Hansen S, Kvale G. Breast cancer risk by age at birth,  
607 time since birth and time intervals between births: exploring interaction effects.  
608 *British journal of cancer* 2005; 92: 167-175.  
609
- 610 31 Goddard ET, Bassale S, Schedin T, Jindal S, Johnston J, Cabral E *et al.*  
611 Association Between Postpartum Breast Cancer Diagnosis and Metastasis and  
612 the Clinical Features Underlying Risk. *JAMA Netw Open* 2019; 2: e186997.  
613
- 614 32 Welch DRA-Ohoo, Hurst DRA-Ohoo. Defining the Hallmarks of Metastasis. LID -  
615 10.1158/0008-5472.CAN-19-0458 [doi].  
616
- 617 33 Cerny J, Stockinger H, Horejsi V. Noncovalent associations of T lymphocyte  
618 surface proteins. *Eur J Immunol* 1996; 26: 2335-2343.  
619

- 620 34 Zhou Y, Gunput RA, Pasterkamp RJ. Semaphorin signaling: progress made and  
621 promises ahead. *Trends in biochemical sciences* 2008; 33: 161-170.  
622
- 623 35 Liu H, Juo ZS, Shim AH, Focia PJ, Chen X, Garcia KC *et al.* Structural basis of  
624 semaphorin-plexin recognition and viral mimicry from Sema7A and A39R  
625 complexes with PlexinC1. *Cell* 2010; 142: 749-761.  
626
- 627 36 Fong KP, Barry C, Tran AN, Traxler Ea, Wannemacher KM, Tang HY *et al.*  
628 Deciphering the human platelet sheddome. *Blood* 2011; 117: 15-27.  
629
- 630 37 Jaimes Y, Gras C, Goudeva L, Buchholz S, Eiz-Vesper B, Seltsam A *et al.*  
631 Semaphorin 7A inhibits platelet production from CD34+ progenitor cells. *Journal*  
632 *of thrombosis and haemostasis : JTH* 2012; 10: 1100-1108.  
633
- 634 38 Xie J, Wang H. Semaphorin 7A as a potential immune regulator and promising  
635 therapeutic target in rheumatoid arthritis. *Arthritis Res Ther* 2017; 19: 10.  
636
- 637 39 Kopp MA, Brommer B, Gatzemeier N, Schwab JM, Pruss H. Spinal cord injury  
638 induces differential expression of the profibrotic semaphorin 7A in the developing  
639 and mature glial scar. *Glia* 2010; 58: 1748-1756.  
640
- 641 40 Gan Y, Reilkoff R, Peng X, Russell T, Chen Q, Mathai SK *et al.* Role of  
642 semaphorin 7a signaling in transforming growth factor beta1-induced lung  
643 fibrosis and scleroderma-related interstitial lung disease. *Arthritis and*  
644 *rheumatism* 2011; 63: 2484-2494.  
645
- 646 41 Reilkoff RA, Peng H, Murray LA, Peng X, Russell T, Montgomery R *et al.*  
647 Semaphorin 7a+ regulatory T cells are associated with progressive idiopathic  
648 pulmonary fibrosis and are implicated in transforming growth factor-beta1-  
649 induced pulmonary fibrosis. *American journal of respiratory and critical care*  
650 *medicine* 2013; 187: 180-188.  
651
- 652 42 Kang H-R, Lee CG, Homer RJ, Elias Ja. Semaphorin 7A plays a critical role in  
653 TGF-beta1-induced pulmonary fibrosis. *The Journal of experimental medicine*  
654 2007; 204: 1083-1093.  
655
- 656 43 Gilmore AP, Owens TW, Foster FM, Lindsay J. How adhesion signals reach a  
657 mitochondrial conclusion--ECM regulation of apoptosis. *Current opinion in cell*  
658 *biology* 2009; 21: 654-661.  
659
- 660 44 Knowles LM, Gurski LA, Engel C, Gnarra JR, Maranchie JK, Pilch J. Integrin  
661  $\alpha\beta3$  and fibronectin upregulate Slug in cancer cells to promote clot invasion and  
662 metastasis. *Cancer research* 2013; 73: 6175-6184.  
663
- 664 45 Lamouille S, Xu J, Derynck R. Molecular mechanisms of epithelial-mesenchymal  
665 transition. *Nature reviews Molecular cell biology* 2014; 15: 178-196.

- 666  
667 46 Chao Y, Wu Q, Acquafondata M, Dhir R, Wells A. Partial mesenchymal to  
668 epithelial reverting transition in breast and prostate cancer metastases. *Cancer*  
669 *microenvironment : official journal of the International Cancer Microenvironment*  
670 *Society* 2012; 5: 19-28.  
671
- 672 47 Smith BN, Bhowmick NA. Role of EMT in Metastasis and Therapy Resistance. *J*  
673 *Clin Med* 2016; 5.  
674
- 675 48 Nurwidya F, Murakami A, Takahashi F, Takahashi K. Molecular mechanisms  
676 contributing to resistance to tyrosine kinase-targeted therapy for non-small cell  
677 lung cancer. *Cancer biology & medicine* 2012; 9: 18-22.  
678
- 679 49 Nurwidya F, Takahashi F, Murakami A, Takahashi K. Epithelial mesenchymal  
680 transition in drug resistance and metastasis of lung cancer. *Cancer research and*  
681 *treatment : official journal of Korean Cancer Association* 2012; 44: 151-156.  
682
- 683 50 Uchikado Y, Okumura H, Ishigami S, Setoyama T, Matsumoto M, Owaki T *et al.*  
684 Increased Slug and decreased E-cadherin expression is related to poor  
685 prognosis in patients with gastric cancer. *Gastric cancer : official journal of the*  
686 *International Gastric Cancer Association and the Japanese Gastric Cancer*  
687 *Association* 2011; 14: 41-49.  
688
- 689 51 Deep G, Jain AK, Ramteke A, Ting H, Vijendra KC, Gangar SC *et al.* SNAI1 is  
690 critical for the aggressiveness of prostate cancer cells with low E-cadherin. *Mol*  
691 *Cancer* 2014; 13: 37.  
692
- 693 52 McKeithen D, Graham T, Chung LW, Odero-Marah V. Snail transcription factor  
694 regulates neuroendocrine differentiation in LNCaP prostate cancer cells. *Prostate*  
695 2010; 70: 982-992.  
696
- 697 53 Cheng GZ, Chan J, Wang Q, Zhang W, Sun CD, Wang LH. Twist  
698 transcriptionally up-regulates AKT2 in breast cancer cells leading to increased  
699 migration, invasion, and resistance to paclitaxel. *Cancer research* 2007; 67:  
700 1979-1987.  
701
- 702 54 Baritaki S, Yeung K, Palladino M, Berenson J, Bonavida B. Pivotal roles of snail  
703 inhibition and RKIP induction by the proteasome inhibitor NPI-0052 in tumor cell  
704 chemoimmunosensitization. *Cancer research* 2009; 69: 8376-8385.  
705
- 706 55 Vesuna F, Lisok A, Kimble B, Domek J, Kato Y, van der Groep P *et al.* Twist  
707 contributes to hormone resistance in breast cancer by downregulating estrogen  
708 receptor-alpha. *Oncogene* 2012; 31: 3223-3234.  
709

- 710 56 Parkash J, Messina A, Langlet F, Cimino I, Loyens A, Mazur D *et al.*  
711 Semaphorin7A regulates neuroglial plasticity in the adult hypothalamic median  
712 eminence. *Nature communications* 2015; 6: 6385.  
713
- 714 57 Eke I, Storch K, Krause M, Cordes N. Cetuximab attenuates its cytotoxic and  
715 radiosensitizing potential by inducing fibronectin biosynthesis. *Cancer research*  
716 2013; 73: 5869-5879.  
717
- 718 58 Pontiggia O, Sampayo R, Raffo D, Motter A, Xu R, Bissell MJ *et al.* The tumor  
719 microenvironment modulates tamoxifen resistance in breast cancer: a role for  
720 soluble stromal factors and fibronectin through beta1 integrin. *Breast cancer*  
721 *research and treatment* 2012; 133: 459-471.  
722
- 723 59 Han SW, Roman J. Fibronectin induces cell proliferation and inhibits apoptosis in  
724 human bronchial epithelial cells: pro-oncogenic effects mediated by PI3-kinase  
725 and NF-kappa B. *Oncogene* 2006; 25: 4341-4349.  
726
- 727 60 Hattar R, Maller O, McDaniel S, Hansen KC, Hedman KJ, Lyons TR *et al.*  
728 Tamoxifen induces pleiotrophic changes in mammary stroma resulting in  
729 extracellular matrix that suppresses transformed phenotypes. *Breast cancer*  
730 *research : BCR* 2009; 11: R5.  
731
- 732 61 Cheng JQ, Jiang X, Fraser M, Li M, Dan HC, Sun M *et al.* Role of X-linked  
733 inhibitor of apoptosis protein in chemoresistance in ovarian cancer: possible  
734 involvement of the phosphoinositide-3 kinase/Akt pathway. *Drug resistance*  
735 *updates : reviews and commentaries in antimicrobial and anticancer*  
736 *chemotherapy* 2002; 5: 131-146.  
737
- 738 62 Fraser M, Leung BM, Yan X, Dan HC, Cheng JQ, Tsang BK. p53 is a  
739 determinant of X-linked inhibitor of apoptosis protein/Akt-mediated  
740 chemoresistance in human ovarian cancer cells. *Cancer research* 2003; 63:  
741 7081-7088.  
742
- 743 63 Knuefermann C, Lu Y, Liu B, Jin W, Liang K, Wu L *et al.* HER2/PI-3K/Akt  
744 activation leads to a multidrug resistance in human breast adenocarcinoma cells.  
745 *Oncogene* 2003; 22: 3205-3212.  
746
- 747 64 Li J, Feng Q, Kim JM, Schneiderman D, Liston P, Li M *et al.* Human ovarian  
748 cancer and cisplatin resistance: possible role of inhibitor of apoptosis proteins.  
749 *Endocrinology* 2001; 142: 370-380.  
750
- 751 65 Gurrupu S, Pupo E, Franzolin G, Lanzetti L, Tamagnone LA-Ohoo.  
752 Sema4C/PlexinB2 signaling controls breast cancer cell growth, hormonal  
753 dependence and tumorigenic potential.  
754

- 755 66 Crump LS, Wyatt G, Porter WW, Richer J, Lyons TR. Hormonal regulation of  
756 Semaphorin 7a in ER+ breast cancer drives therapeutic resistance. *bioRxiv*  
757 2019: 650135.  
758
- 759 67 Provenzano PP, Eliceiri KW, Campbell JM, Inman DR, White JG, Keely PJ.  
760 Collagen reorganization at the tumor-stromal interface facilitates local invasion.  
761 *BMC medicine* 2006; 4: 38.  
762
- 763 68 Provenzano PP, Inman DR, Eliceiri KW, Knittel JG, Yan L, Rueden CT *et al.*  
764 Collagen density promotes mammary tumor initiation and progression. *BMC*  
765 *medicine* 2008; 6: 11-11.  
766
- 767 69 Slocum E, Craig A, Villanueva A, Germain D. Parity predisposes breasts to the  
768 oncogenic action of PAPP-A and activation of the collagen receptor DDR2.  
769
- 770 70 Ristimäki A, Sivula A, Lundin J, Ristima A, Lundin M, Salminen T *et al.*  
771 Prognostic Significance of Elevated Cyclooxygenase-2 Expression in Breast  
772 Cancer Advances in Brief Prognostic Significance of Elevated Cyclooxygenase-2  
773 Expression in Breast Cancer 12002: 632-635.  
774
- 775 71 Denkert C, Winzer K-J, Müller B-M, Weichert W, Pest S, Köbel M *et al.* Elevated  
776 expression of cyclooxygenase-2 is a negative prognostic factor for disease free  
777 survival and overall survival in patients with breast carcinoma. *Cancer* 2003; 97:  
778 2978-2987.  
779
- 780 72 Pasterkamp RJ, Peschon JJ, Spriggs MK, Kolodkin AL. Semaphorin 7A  
781 promotes axon outgrowth through integrins and MAPKs. *Nature* 2003; 424: 398-  
782 405.  
783
- 784 73 Hu M, Peluffo G, Chen H, Gelman R, Schnitt S, Polyak K. Role of COX-2 in  
785 epithelial-stromal cell interactions and progression of ductal carcinoma in situ of  
786 the breast. *Proceedings of the National Academy of Sciences of the United*  
787 *States of America* 2009; 106: 3372-3377.  
788
- 789 74 Valdez KE, Fan F Fau - Smith W, Smith W Fau - Allred DC, Allred Dc Fau -  
790 Medina D, Medina D Fau - Behbod F, Behbod F. Human primary ductal  
791 carcinoma in situ (DCIS) subtype-specific pathology is preserved in a mouse  
792 intraductal (MIND) xenograft model.  
793
- 794 75 Nagy A, Lanczky A, Menyhart O, Gyorffy B. Author Correction: Validation of  
795 miRNA prognostic power in hepatocellular carcinoma using expression data of  
796 independent datasets. *Scientific reports* 2018; 8: 11515.  
797
- 798 76 Dean JL, McClendon aK, Hickey TE, Butler LM, Tilley WD, Witkiewicz AK *et al.*  
799 Therapeutic response to CDK4/6 inhibition in breast cancer defined by ex vivo  
800 analyses of human tumors. *Cell cycle* 2012; 11: 2756-2761.

- 801  
802 77 Barrett AS, Wither MJ, Hill RC, Dzieciatkowska M, D'Alessandro A, Reisz JA *et al.* Hydroxylamine Chemical Digestion for Insoluble Extracellular Matrix  
803 *Characterization. Journal of proteome research* 2017; 16: 4177-4184.  
804  
805  
806 78 Reisz JA, Nemkov T, Dzieciatkowska M, Culp-Hill R, Stefanoni D, Hill RC *et al.*  
807 Methylation of protein aspartates and deamidated asparagines as a function of  
808 blood bank storage and oxidative stress in human red blood cells. *Transfusion*  
809 2018; 58: 2978-2991.  
810  
811 79 Chong J, Xia J. MetaboAnalystR: an R package for flexible and reproducible  
812 analysis of metabolomics data. *Bioinformatics* 2018; 34: 4313-4314.  
813  
814 80 Mi H, Muruganujan A, Ebert D, Huang X, Thomas PD. PANTHER version 14:  
815 more genomes, a new PANTHER GO-slim and improvements in enrichment  
816 analysis tools. *Nucleic acids research* 2019; 47: D419-d426.  
817  
818  
819

820 **Figure 1. SEMA7A promotes growth and invasion in PPBC. A.** Tumor volumes for  
821 control (Ctrl) or shSEMA7A (SEMA7A-KD) MCF10DCIS cells in postpartum hosts  
822 (n=12/group), inset: representative immunoblot for SEMA7A and GAPDH. **B.** Tumors  
823 from Ctrl and SEMA7A-KD from postpartum hosts scored for invasion (n=12/group). **C.**  
824 Trichrome stained quantification (top) and representative images (bottom) of collagen of  
825 tumors from Ctrl and SEMA7A-KD tumors from postpartum hosts, scale bars 50 $\mu$ m  
826 (n=12/group). **D.** IHC quantification (top) and representative images (bottom) of IHC for  
827 COX-2 of tumors from Ctrl and SEMA7A-KD tumors from postpartum hosts, scale bars  
828 50 $\mu$ m (n=12/group) (\*p<0.05, \*\*p<0.01, \*\*\*p<0.0005, \*\*\*\*p<0.0001, t-test).

829 **Figure 2. SEMA7A expression is increased in DCIS patient samples. A.**  
830 Representative images of normal (top) or DCIS lesions (bottom) from postpartum  
831 patients from the CU Anschutz Medical Campus Young Women's BC (YWBC) stained  
832 by IHC for SEMA7A, with quantification mask to the right, blue=negative; yellow=weak;  
833 orange=medium; red=strong; scale bars 50  $\mu$ m. **B.** Quantification of SEMA7A IHC of  
834 normal or DCIS patient samples from the CU Anschutz YWBC cohort (n=103), then  
835 separated by parity status, nulliparous (n=52) or postpartum (n=51). **C.** Quantification of  
836 SEMA7A IHC from nulliparous patients by patient, paired t-test. **D.** Quantification of  
837 SEMA7A IHC from postpartum patients by patient, paired t-test. **E.** Representative  
838 images of SEMA7A IHC stain from tissue array of samples, scale bars 50 $\mu$ m. **F.**  
839 Quantification of SEMA7A IHC stain from **C**; normal (n=32) or DCIS (n=30). **G.**  
840 Quantification of SEMA7A IHC by patient, paired t-test. (\*p<0.05, \*\*p<0.01, \*\*\*\*p<0.001)

841

842 **Figure 3. SEMA7A expression is sufficient to drive tumor growth and invasion. A.**

843 Tumor volumes for control (NUL Ctrl) or SEMA7A overexpressing (NUL SEMA7A OE)  
844 in nulliparous hosts (n=10/group), inset: representative immunoblot for SEMA7A and  
845 GAPDH. **B.** Tumors from NUL Ctrl and NUL SEMA7A OE scored for invasion  
846 (n=10/group). **C.** Trichrome stained quantification (top) and representative images  
847 (bottom) of collagen of tumors from NUL Ctrl and NUL SEMA7A OE tumors, scale bars  
848 50 $\mu$ m **D.** IHC quantification (top) and representative images (bottom) of IHC for COX-2  
849 of tumors from NUL Ctrl and NUL SEMA7A OE tumors, scale bars 50 $\mu$ m (\*p<0.05,  
850 \*\*p<0.01, \*\*\*p<0.0005, \*\*\*\*p<0.0001, t-test).

851 **Figure 4. SEMA7A promotes invasion via fibroblast mediated collagen deposition.**

852 **A.** Ctrl or SEMA7A OE MCF10DCIS cells embedded in matrigel scored for invasion. **B.**  
853 Ctrl or SEMA7A OE MCF10DCIS cells embedded in matrigel plus 20% collagen. **C.**  
854 Control (Ctrl) or shSEMA7A (KD) MDA-MB-231 cells in matrigel plus 25% collagen  
855 scored for invasion. **D.** Quantitative RT-PCR (q-PCR) for COL1A1 in fibroblasts in  
856 serum free media (SFM) treated with 10 ng/mL TGF $\beta$  or conditioned media (CM) from  
857 control (Ctrl) or SEMA7A overexpressing (SEMA7A OE) MDA-MB-231 cell lines. **E.**  
858 qPCR for COLA1A in fibroblasts in SFM treated with 75 ng/ $\mu$ L purified SEMA7A.  
859 (\*p<0.05, \*\*p<0.01, \*\*\*p<0.005, t-test).

860 **Figure 5. SEMA7A promotes mesenchymal protein expression and phenotypes.**

861 **A.** Global proteomics analysis of secreted proteins reveals decreased fibronectin (FN) in  
862 MCF10DCIS shSEMA7A (SEMA7A-KD) tumors compared to control (Ctrl) ex vivo  
863 (n=10-11/group). **B&C.** IHC for FN in MCF10DCIS Ctrl and SEMA7A-KD tumors (B),  
864 and MCF10DCIS Ctrl and SEMA7A overexpressing (SEMA7A OE) tumors, scale bar



865 50 $\mu$ m. **D-F.** Additional decreases in mesenchymal or mesenchymal associated proteins  
866 observed by proteomics in shSEMA7A (SEMA7A-KD) tumors ex vivo. **G.**  
867 Immunofluorescence for F-actin in MDA-MB-231 Ctrl or KD cells and quantification for  
868 cell aspect ratio (length/width). **H.** Immunofluorescence for F-actin in MCF10DCIS Ctrl  
869 or SEMA7A OE cells and quantification for cell aspect ratio (length/width). (\* $p$ <0.05,  
870 \*\* $p$ <0.01, \*\*\* $p$ <0.005, \*\*\*\* $p$ <0.001, t-test)

871 **Figure 6. SEMA7A promotes cell survival via fibronectin. A&B.** Fold change of  
872 cleaved caspase 3/7 activity in control (Ctrl) and shSEMA7A (KD) in MCF10DCIS (**A**) or  
873 MDA-MB-231 (**B**) cell lines. **C.** Cleaved caspase 3/7 activity measured over time in  
874 MDA-MB-231 Ctrl or KD cells. **D.** Representative immunoblot for phospho-AKT (S473),  
875 total AKT, or GAPDH in Ctrl or KD, quantified to the right. **E.** Cleaved caspase 3/7  
876 activity control (Ctrl) or shSEMA7A (KD) cells plated on tissue culture plastic (TC),  
877 laminin (LAM), collagen I (COL) or fibronectin (FN). **F&G.** Cleaved caspase 3/7 activity  
878 MCF10DCIS (**F**) or MDA-MB-231 (**G**) Ctrl or KD cells in forced suspension. **H.** Cleaved  
879 caspase 3/7 activity in MCF10DCIS Ctrl or shCOX-2 (KD1/KD2) cell lines in forced  
880 suspension.

881 **Figure 7. SEMA7A drives metastatic seeding and poor prognosis in patients. A.**  
882 Average area of metastasis in lungs of mice after tail vein injection with MDA-MB-231  
883 control (Ctrl) or shSEMA7A (KD1, KD2) cells (n=5/group), representative images of  
884 lungs to the right. **B.** Kaplan-Meier analysis of ER- BCs using Km plotter for SEMA7A,  
885 COX-2 and FN mRNA expression for distant metastasis free survival (DMFS) (n=228).  
886 **C.** Kaplan-Meier analysis of ER-BCs in the Ma Breast Cancer dataset using GOBO for  
887 SEMA7A, COX-2 and FN mRNA expression for distant metastasis free survival (DMFS)

888 (n=320) **D&E**. Co-expression analysis of the TCGA BC provisional cohort using  
889 CBioPortal for all BCs (n=1108). (\*p<0.05, \*\*p<0.01, \*\*\*p<0.005 \*\*\*\*p<0.001).  
890 **Figure 8. Model depicting SEMA7A mediated invasion and cell survival.** Our  
891 current data suggests SEMA7A promotes fibroblast mediated collagen deposition,  
892 resulting in COX-2 expression and tumor cell invasion. Our results also suggest that  
893 SEMA7A can promote cell survival through SEMA7A mediated fibronectin expression.

**Figure 1**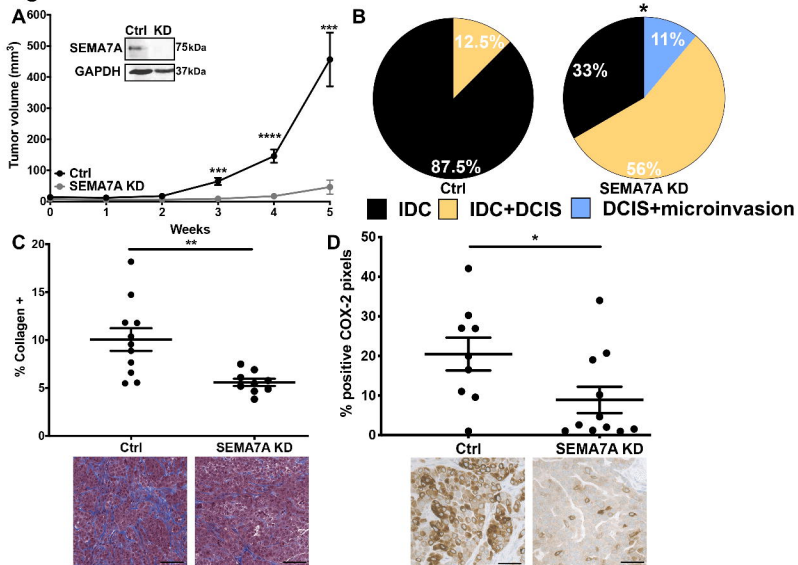

**Figure 2****A**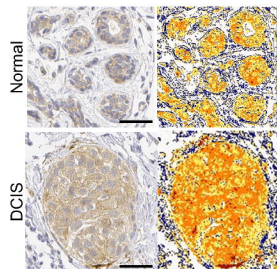**B**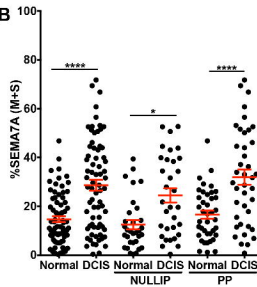**C**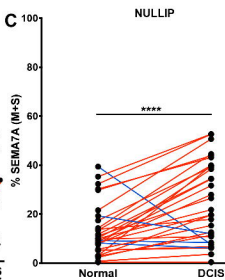**D**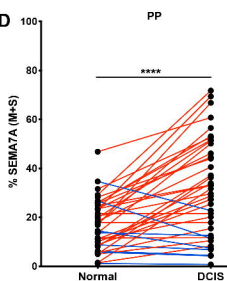**E**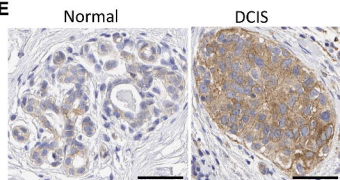**F**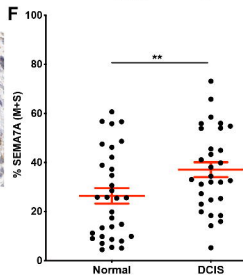**G**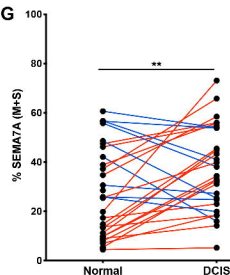

**Figure 3**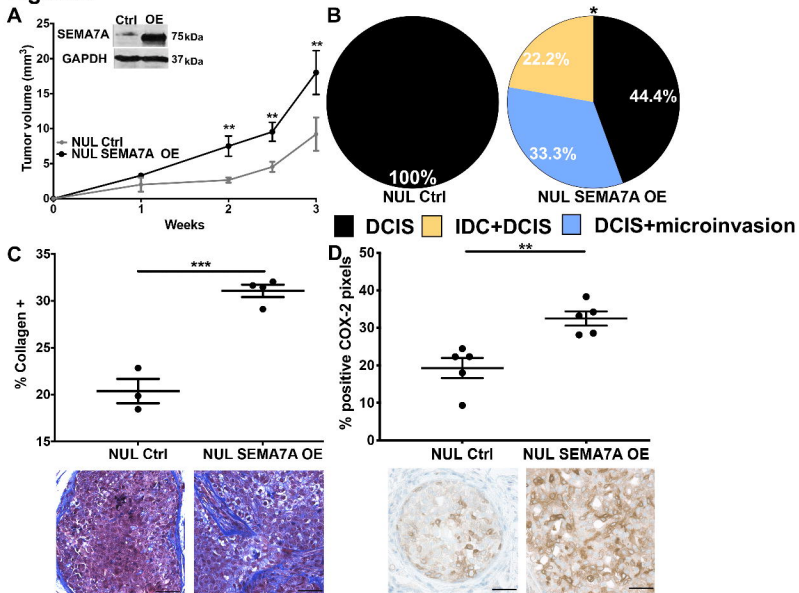

**Figure 4**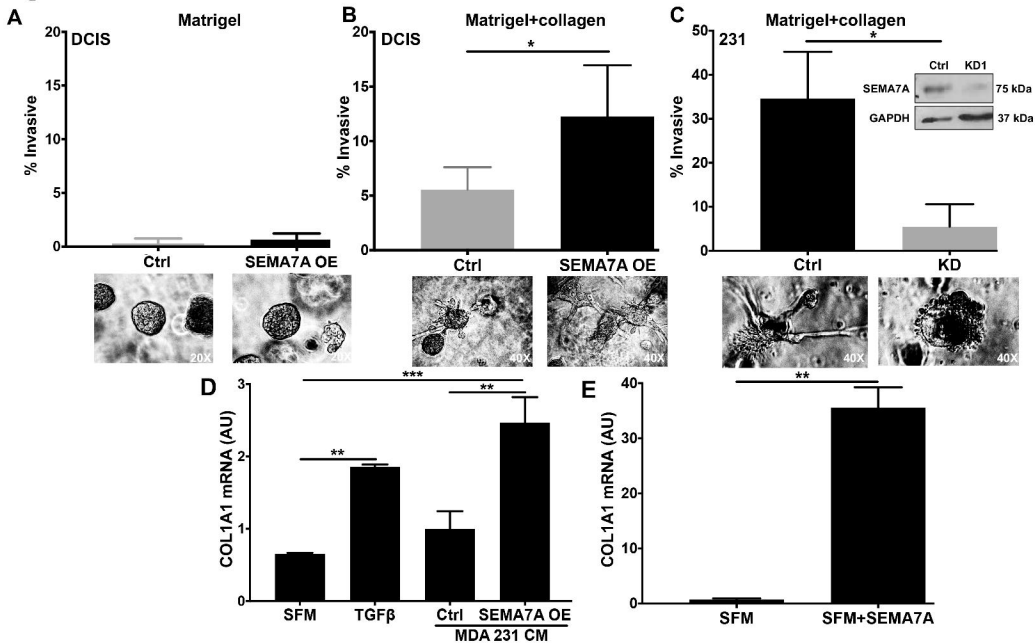

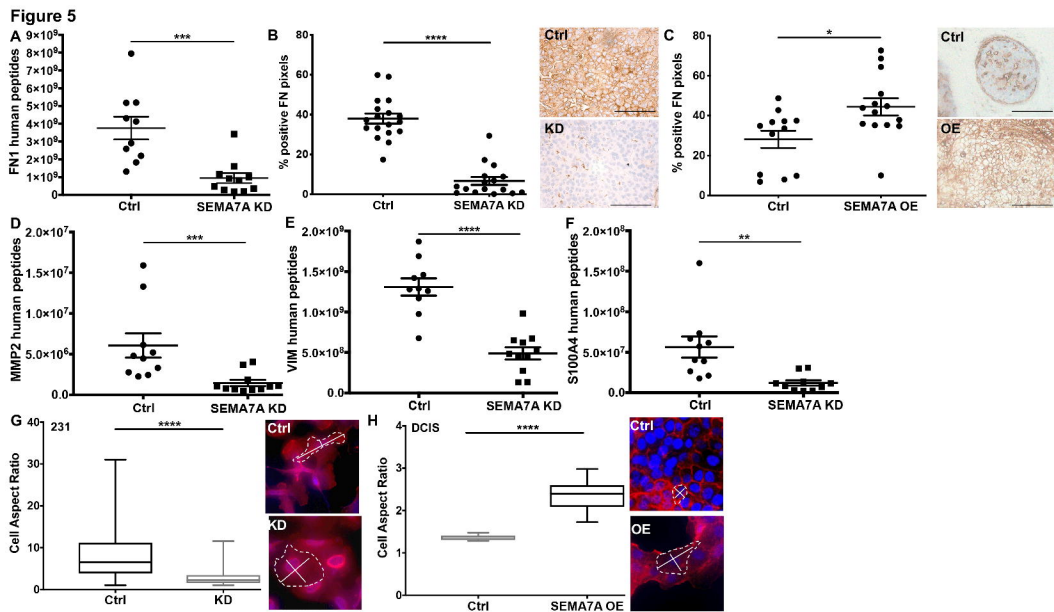

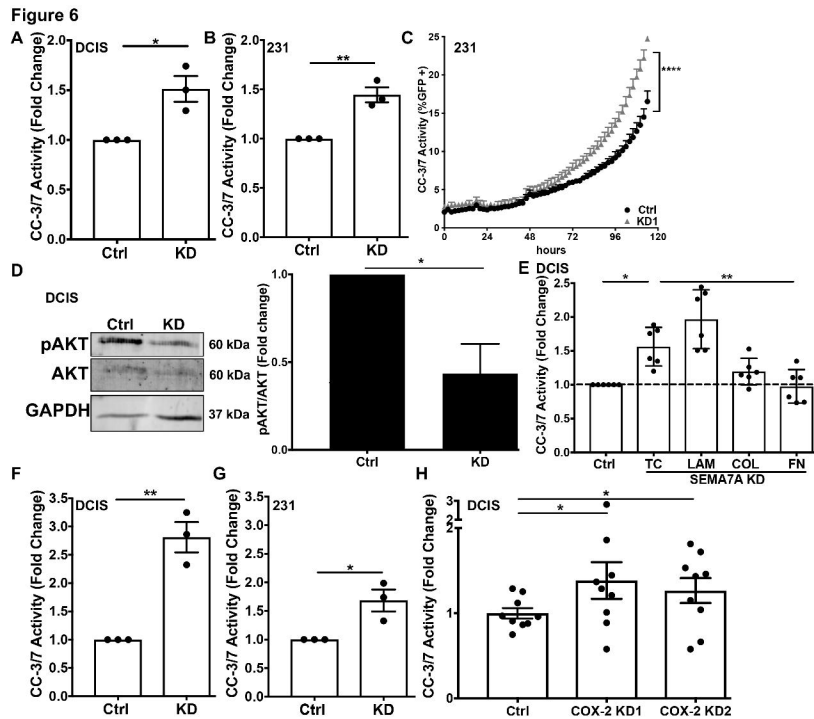



**Figure 7****A**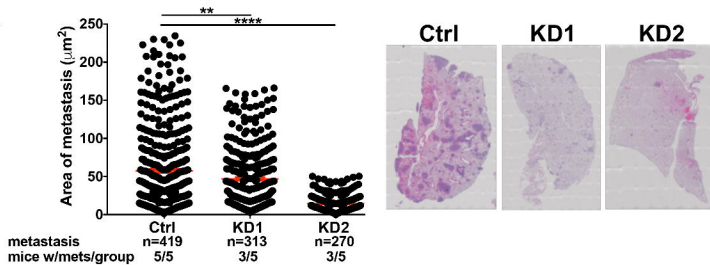**B**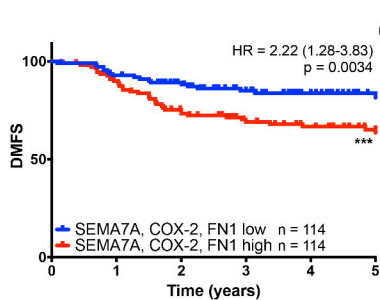**C**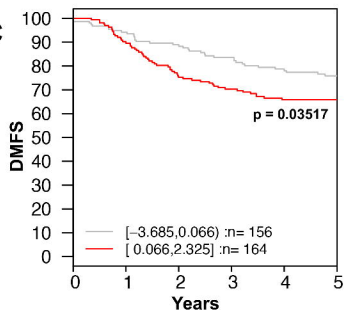**D**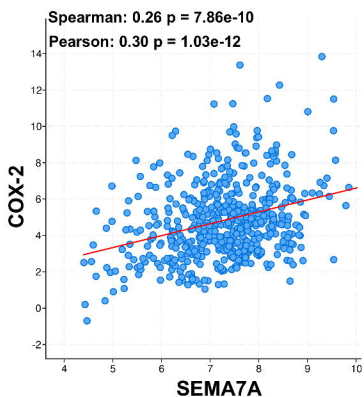**E**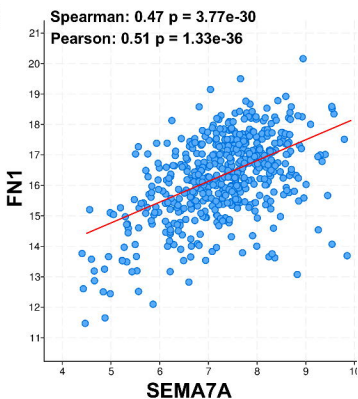

**Figure 8**

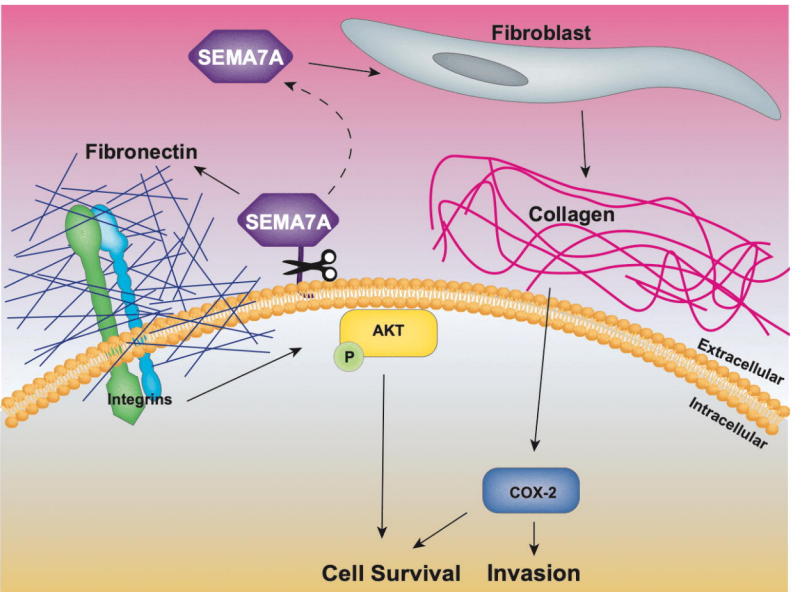

Source: https://www.biorxiv.org/content/10.1101/631044v3.full.pdf
